# Supplementary material for: Rationale for Intervention and Dose Is Lacking in Stroke Recovery Trials: A Systematic Review
Source: Hindawi journal article supplement (doi:10.1155/2018/8087372), 2018-10-30
Supplement: f1 [file 8087372.f1.pdf]

## Supplementary materials

**Online supplementary Table 1. Search of Medline via OVID for stroke rehabilitation controlled trials 2012- 2016**

| Line | Search Term                                                                                                                                                                                                                                                                                              | Records  |
|------|----------------------------------------------------------------------------------------------------------------------------------------------------------------------------------------------------------------------------------------------------------------------------------------------------------|----------|
| 1    | exp Stroke/                                                                                                                                                                                                                                                                                              | 104259   |
| 2    | ((brain or cerebral or cerebrovascular) adj3 (accident* or infarct* or stroke)) or CVA*).mp.                                                                                                                                                                                                             | 57908    |
| 3    | ((((brain* or cerebr* or cerebell* or intracran* or intracerebral or vertebrobasilar) and vascular*) or cerebrovascular*) and (disease or diseases or accident* or disorder*)).mp.                                                                                                                       | 109053   |
| 4    | CVA*.mp.                                                                                                                                                                                                                                                                                                 | 3423     |
| 5    | exp Cerebrovascular Disorders/ or post stroke.mp.                                                                                                                                                                                                                                                        | 314551   |
| 6    | ((brain* or cerebr* or cerebell* or intracran* or intracerebral or vertebrobasilar) and (haemorrhag* or hemorrhag* or ischemi* or ischaemi* or infarct* or haematoma* or hematoma* or bleed*)).mp.                                                                                                       | 219722   |
| 7    | plegia.mp. or exp Paralysis/                                                                                                                                                                                                                                                                             | 77256    |
| 8    | 1 or 2 or 3 or 4 or 5 or 6 or 7                                                                                                                                                                                                                                                                          | 478211   |
| 9    | exp Randomized Controlled Trials as Topic/ or randomised controlled trial.mp.                                                                                                                                                                                                                            | 124256   |
| 10   | exp Controlled Clinical Trial/                                                                                                                                                                                                                                                                           | 514774   |
| 11   | controlled clinical trial.mp. or exp Controlled Clinical Trial/                                                                                                                                                                                                                                          | 517914   |
| 12   | (randomised or randomized or randomly or random* or random).mp.                                                                                                                                                                                                                                          | 1062025  |
| 13   | group*.mp.                                                                                                                                                                                                                                                                                               | 3162420  |
| 14   | (phase 1 or phase I or phase 2 or Phase II or Phase 3 or Phase III or Phase 4 or Phase IV).mp. [mp=title, abstract, original title, name of substance word, subject heading word, keyword heading word, protocol supplementary concept word, rare disease supplementary concept word, unique identifier] | 132404   |
| 15   | 9 or 10 or 11 or 12 or 13 or 14                                                                                                                                                                                                                                                                          | 3877450  |
| 16   | exp Neurological Rehabilitation/ or exp Rehabilitation/ or rehabilitation.mp. or exp "Physical and Rehabilitation Medicine"/                                                                                                                                                                             | 265908   |
| 17   | training.mp.                                                                                                                                                                                                                                                                                             | 322179   |
| 18   | exp Exercise Therapy/                                                                                                                                                                                                                                                                                    | 37464    |
| 19   | therapy.mp.                                                                                                                                                                                                                                                                                              | 2025576  |
| 20   | (therapies or therap* or ex* or exercise or training or train*).mp. [mp=title, abstract, original title, name of substance word, subject heading word, keyword heading word, protocol supplementary concept word, rare disease supplementary concept word, unique identifier]                            | 13713128 |
| 21   | 16 or 17 or 18 or 19 or 20                                                                                                                                                                                                                                                                               | 13786389 |

|    |                                              |          |
|----|----------------------------------------------|----------|
| 22 | drug.mp. or exp Pharmaceutical Preparations/ | 2458120  |
| 23 | drug therapy.mp. or exp Drug Therapy/        | 1194268  |
| 24 | device.mp. or exp "Equipment and Supplies"/  | 1392931  |
| 25 | 22 or 23 or 24                               | 4263296  |
| 26 | 8 and 15 and 21                              | 13786389 |
| 27 | 26 not 25                                    | 53279    |
| 28 | limit 27 to humans                           | 41711    |
| 29 | limit 28 to last 10 years                    | 22916    |
| 30 | limit 28 to last 5 years                     | 13477    |

Note: search was run on 15 August 2016.

**Online supplementary Table 2. Included Cochrane reviews, number of individual trials and sample sizes included in review**

| <b>Cochrane Review</b>                                                                                                                                            | <b>Trials in Cochrane Review</b> | <b>Trials from Cochrane Review included in current review (Number of participants)</b> | <b>Reason for excluding Cochrane trials in current review</b>              |
|-------------------------------------------------------------------------------------------------------------------------------------------------------------------|----------------------------------|----------------------------------------------------------------------------------------|----------------------------------------------------------------------------|
| Barclay-Goddard et al. 2004<br><i>Force platform feedback for standing balance training after stroke</i>                                                          | 7                                | 6 (230)                                                                                | 1= Unable to source                                                        |
| Barclay-Goddard et al. 2011 *<br><i>Mental practice for treating upper extremity deficits in individuals with hemiparesis after stroke</i>                        | 6                                | 6 (119)                                                                                | -                                                                          |
| Bernhardt et al. 2009 *<br><i>Very early versus delayed mobilisation after stroke</i>                                                                             | 1                                | 1 (71)                                                                                 | -                                                                          |
| Bowen et al. 2013 *<br><i>Cognitive rehabilitation for spatial neglect following stroke</i>                                                                       | 23                               | 20 (561)                                                                               | 3= Unable to Source                                                        |
| Bowen et al. 2011 *<br><i>Non-pharmacological interventions for perceptual disorders following stroke and other adult-acquired, non- progressive brain injury</i> | 6                                | 2 (130)                                                                                | 1= <50% stroke<br>1= Duplicate<br>2= Unable to source                      |
| Bradt et al. 2010<br><i>Music therapy for acquired brain injury</i>                                                                                               | 7                                | 3 (118)                                                                                | 3= Not RCT<br>1= Not in English                                            |
| Brady et al. 2012<br><i>Speech and language therapy for aphasia following stroke</i><br><i>Some evidence of effectiveness</i>                                     | 39                               | 26 (1477)                                                                              | 3= Not RCT<br>6= Not in English<br>3= Not full text<br>1= Unable to source |

| <b>Cochrane Review</b>                                                                                                                                     | <b>Trials in Cochrane Review</b> | <b>Trials from Cochrane Review included in current review (Number of participants)</b> | <b>Reason for excluding Cochrane trials in current review</b> |
|------------------------------------------------------------------------------------------------------------------------------------------------------------|----------------------------------|----------------------------------------------------------------------------------------|---------------------------------------------------------------|
| Coupar et al. 2010 *<br><i>Simultaneous bilateral training for improving arm function after stroke</i><br><i>Insufficient evidence to make conclusions</i> | 18                               | 13 (456)                                                                               | 5= Not RCT                                                    |
| das Nair et al 2007 *<br><i>Cognitive rehabilitation for memory deficits following stroke</i>                                                              | 2                                | 1 (12)                                                                                 | 1= <50% stroke                                                |
| Doyle et al. 2010 *<br><i>Interventions for sensory impairment in the upper limb after stroke</i>                                                          | 13                               | 9 (353)                                                                                | 4= Not full text                                              |
| English et al 2010<br><i>Circuit class therapy for improving mobility after stroke</i><br>Conclusion = 'CCT is safe and effective'                         | 6                                | 2 (154)                                                                                | 1= Not RCT<br>3= Duplicate                                    |
| French et al. 2007<br><i>Repetitive task training for improving functional ability after stroke</i>                                                        | 14                               | 11 (482)                                                                               | 1= Not RCT<br>2= Duplicate                                    |
| Hoffmann et al. 2007 *<br><i>Occupational therapy for cognitive impairment in stroke patients</i>                                                          | 1                                | 1 (33)                                                                                 | -                                                             |
| Legg et al. 2006<br><i>Occupational therapy for patients with problems in activities of daily living after stroke</i>                                      | 9                                | 7 (1075)                                                                               | -                                                             |

| <b>Cochrane Review</b>                                                                                                                          | <b>Trials in Cochrane Review</b> | <b>Trials from Cochrane Review included in current review (Number of participants)</b> | <b>Reason for excluding Cochrane trials in current review</b>                                   |
|-------------------------------------------------------------------------------------------------------------------------------------------------|----------------------------------|----------------------------------------------------------------------------------------|-------------------------------------------------------------------------------------------------|
| Loestcher et al. 2013 *<br><i>Cognitive rehabilitation for attention deficits following stroke</i>                                              | 6                                | 4 (146)                                                                                | 2= Not in English                                                                               |
| McGeough et al. 2009 *<br><i>Interventions for post-stroke fatigue</i>                                                                          | 3                                | 0                                                                                      | 1= No RCT<br>2= Drug trial                                                                      |
| Mehrholz et al. 2011 *<br><i>Water-based exercises for improving activities of daily living after stroke</i>                                    | 4                                | 2 (38)                                                                                 | 1= Not in English<br>1= Not full text                                                           |
| Pollock et al. 2007<br><i>Physiotherapy treatment approaches for the recovery of postural control and lower limb function following stroke.</i> | 21                               | 6 (403)                                                                                | 10= Duplicate<br>2= Not RCT<br>1=No full text<br>2= Unable to source                            |
| Pollock et al. 2011 *<br><i>Interventions for visual field defects in patients with stroke.</i>                                                 | 13                               | 5 (125)                                                                                | 3= Duplicate<br>2= <50% stroke<br>2= Not full text<br>1= Unable to source                       |
| Saunders et al. 2013<br><i>Physical fitness training for stroke patients</i>                                                                    | 45                               | 39 (1891)                                                                              | 1= Duplicate<br>1= < 50% stroke<br>1= Not in English<br>2= Not full text<br>1= Unable to source |
| Sellars et al. 2005 *<br><i>Speech and language therapy for dysarthria due to non-progressive brain damage</i>                                  | 0                                | 0                                                                                      | -                                                                                               |

| <b>Cochrane Review</b>                                                                                                      | <b>Trials in Cochrane Review</b> | <b>Trials from Cochrane Review included in current review (Number of participants)</b> | <b>Reason for excluding Cochrane trials in current review</b> |
|-----------------------------------------------------------------------------------------------------------------------------|----------------------------------|----------------------------------------------------------------------------------------|---------------------------------------------------------------|
| Sirtori et al. 2009<br><i>Constraint-induced movement therapy for upper extremities in stroke patients</i>                  | 19                               | 17 (604)                                                                               | 1= Not RCT<br>1= Unable to source                             |
| States et al. 2009 *<br><i>Overground physical therapy gait training for chronic stroke patients with mobility deficits</i> | 9                                | 2 (68)                                                                                 | 1= Not intervention<br>6= Duplicate                           |
| Thieme et al. 2012<br><i>Mirror therapy for improving motor function after stroke</i>                                       | 14                               | 9 (446)                                                                                | 2= Not full text<br>3= Not in English                         |
| West et al. 2005 *<br><i>Interventions for apraxia of speech following stroke</i>                                           | 0                                | 0                                                                                      | -                                                             |
| West et al. 2008 *<br><i>Interventions for motor apraxia following stroke</i>                                               | 3                                | 2 (52)                                                                                 | 1= Duplicate                                                  |
| Winter et al. 2011<br><i>Hands-on therapy interventions for upper limb motor dysfunction following stroke</i>               | 3                                | 0                                                                                      | 1= Duplicate<br>1= Not in English<br>1= Unable to source      |
| <b>TOTALS</b>                                                                                                               | 292                              | 194 (9,044)                                                                            |                                                               |

**Online supplementary Table 3. Location of first author by country**

| Country                  | Number of trials<br>included in review |
|--------------------------|----------------------------------------|
| Australia                | 11                                     |
| Belgium                  | 3                                      |
| Brazil                   | 1                                      |
| Canada                   | 17                                     |
| China                    | 1                                      |
| Finland                  | 1                                      |
| France                   | 2                                      |
| Germany                  | 15                                     |
| Hong Kong                | 3                                      |
| Ireland                  | 2                                      |
| Israel                   | 2                                      |
| Italy                    | 8                                      |
| Japan                    | 2                                      |
| Korea                    | 3                                      |
| Netherlands              | 10                                     |
| New Zealand              | 2                                      |
| Norway                   | 4                                      |
| Poland                   | 1                                      |
| Portugal                 | 1                                      |
| Saudi Arabia             | 1                                      |
| Singapore                | 1                                      |
| Sweden                   | 3                                      |
| Taiwan                   | 15                                     |
| Turkey                   | 3                                      |
| United Kingdom           | 33                                     |
| United States of America | 49                                     |
